# Supplementary material for: X-ray Structure Elucidation of a Pt-Metalloporphyrin and Its Application for Obtaining Sensitive AuNPs-Plasmonic Hybrids Capable of Detecting Triiodide Anions
Source: MDPI journal article supplement (doi:10.3390/ijms20030710), 2019-02-07

# checkCIF/PLATON report

Structure factors have been supplied for datablock(s) shi\_3848\_mz

THIS REPORT IS FOR GUIDANCE ONLY. IF USED AS PART OF A REVIEW PROCEDURE FOR PUBLICATION, IT SHOULD NOT REPLACE THE EXPERTISE OF AN EXPERIENCED CRYSTALLOGRAPHIC REFEREE.

No syntax errors found.      CIF dictionary      Interpreting this report

## Datablock: shi\_3848\_mz

---

|                 |                                |                                      |
|-----------------|--------------------------------|--------------------------------------|
| Bond precision: | C-C = 0.0118 A                 | Wavelength=0.71073                   |
| Cell:           | a=14.1668(15)                  | b=9.6654(5)      c=15.5836(10)       |
|                 | alpha=90                       | beta=99.744(8)      gamma=90         |
| Temperature:    | 180 K                          |                                      |
|                 | Calculated                     | Reported                             |
| Volume          | 2103.0(3)                      | 2103.0(3)                            |
| Space group     | P 21/c                         | P 1 21/c 1                           |
| Hall group      | -P 2ybc                        | -P 2ybc                              |
| Moiety formula  | 2(C48 H36 N4 O4 Pt), C3 H8 N O | C48 H36 N4 O4 Pt, 0.25(C6 H16 N2 O2) |
| Sum formula     | C99 H80 N9 O9 Pt2              | C49.50 H40 N4.50 O4.50 Pt            |
| Mr              | 1929.88                        | 964.95                               |
| Dx,g cm-3       | 1.524                          | 1.524                                |
| Z               | 1                              | 2                                    |
| Mu (mm-1)       | 3.388                          | 3.388                                |
| F000            | 965.0                          | 965.0                                |
| F000'           | 961.99                         |                                      |
| h,k,lmax        | 16,11,18                       | 16,11,18                             |
| Nref            | 3727                           | 3705                                 |
| Tmin,Tmax       | 0.673,0.934                    | 0.982,1.000                          |
| Tmin'           | 0.596                          |                                      |

Correction method= # Reported T Limits: Tmin=0.982 Tmax=1.000  
AbsCorr = MULTI-SCAN

Data completeness= 0.994      Theta(max)= 25.026

R(reflections)= 0.0488( 2415)      wR2(reflections)= 0.1187( 3705)

S = 1.000      Npar= 240

---

The following ALERTS were generated. Each ALERT has the format

**test-name\_ALERT\_alert-type\_alert-level.**

Click on the hyperlinks for more details of the test.

### Alert level A

|                   |                              |        |    |           |
|-------------------|------------------------------|--------|----|-----------|
| PLAT770_ALERT_2_A | Suspect C-H Bond in CIF: C26 | --H27A | .  | 1.44 Ang. |
| PLAT772_ALERT_2_A | Suspect O-H Bond in CIF: O3  | --H27D | .. | 1.52 Ang. |

### Alert level B

|                   |                                                |        |              |
|-------------------|------------------------------------------------|--------|--------------|
| PLAT201_ALERT_2_B | Isotropic non-H Atoms in Main Residue(s) ..... |        | 8 Report     |
| PLAT772_ALERT_2_B | Suspect O-H Bond in CIF: O3                    | --H27B | .. 1.49 Ang. |

### Alert level C

|                   |                                                  |                             |              |
|-------------------|--------------------------------------------------|-----------------------------|--------------|
| PLAT213_ALERT_2_C | Atom C8                                          | has ADP max/min Ratio ..... | 3.6 prolat   |
| PLAT220_ALERT_2_C | Non-Solvent Resd 1 C                             | Ueq(max)/Ueq(min) Range     | 3.7 Ratio    |
| PLAT250_ALERT_2_C | Large U3/U1 Ratio for Average U(i,j) Tensor .... |                             | 2.6 Note     |
| PLAT342_ALERT_3_C | Low Bond Precision on C-C Bonds .....            |                             | 0.01182 Ang. |
| PLAT906_ALERT_3_C | Large K Value in the Analysis of Variance .....  |                             | 32.366 Check |
| PLAT906_ALERT_3_C | Large K Value in the Analysis of Variance .....  |                             | 4.672 Check  |
| PLAT911_ALERT_3_C | Missing FCF Refl Between Thmin & STh/L=          | 0.595                       | 21 Report    |
| PLAT973_ALERT_2_C | Check Calcd Positive Resid. Density on           | Pt1                         | 1.02 eA-3    |
| PLAT975_ALERT_2_C | Check Calcd Resid. Dens. 0.79A                   | From O1                     | 0.43 eA-3    |
| PLAT977_ALERT_2_C | Check Negative Difference Density on H27C        |                             | -0.41 eA-3   |

### Alert level G

|                   |                                                  |                   |              |
|-------------------|--------------------------------------------------|-------------------|--------------|
| PLAT002_ALERT_2_G | Number of Distance or Angle Restraints on AtSite |                   | 13 Note      |
| PLAT003_ALERT_2_G | Number of Uiso or Uij Restrained non-H Atoms ... |                   | 5 Report     |
| PLAT012_ALERT_1_G | No _shelx_res_checksum Found in CIF .....        |                   | Please Check |
| PLAT042_ALERT_1_G | Calc. and Reported MoietyFormula Strings Differ  |                   | Please Check |
| PLAT045_ALERT_1_G | Calculated and Reported Z Differ by a Factor ... |                   | 0.50 Check   |
| PLAT171_ALERT_4_G | The CIF-Embedded .res File Contains EADP Records |                   | 2 Report     |
| PLAT172_ALERT_4_G | The CIF-Embedded .res File Contains DFIX Records |                   | 2 Report     |
| PLAT176_ALERT_4_G | The CIF-Embedded .res File Contains SADI Records |                   | 2 Report     |
| PLAT187_ALERT_4_G | The CIF-Embedded .res File Contains RIGU Records |                   | 1 Report     |
| PLAT300_ALERT_4_G | Atom Site Occupancy of N3                        | Constrained at    | 0.5 Check    |
| PLAT300_ALERT_4_G | Atom Site Occupancy of O3                        | Constrained at    | 0.25 Check   |
| PLAT300_ALERT_4_G | Atom Site Occupancy of C25                       | Constrained at    | 0.25 Check   |
| PLAT300_ALERT_4_G | Atom Site Occupancy of C26                       | Constrained at    | 0.25 Check   |
| PLAT300_ALERT_4_G | Atom Site Occupancy of C27                       | Constrained at    | 0.25 Check   |
| PLAT300_ALERT_4_G | Atom Site Occupancy of H25                       | Constrained at    | 0.25 Check   |
| PLAT300_ALERT_4_G | Atom Site Occupancy of H26A                      | Constrained at    | 0.25 Check   |
| PLAT300_ALERT_4_G | Atom Site Occupancy of H26B                      | Constrained at    | 0.25 Check   |
| PLAT300_ALERT_4_G | Atom Site Occupancy of H26C                      | Constrained at    | 0.25 Check   |
| PLAT300_ALERT_4_G | Atom Site Occupancy of H27A                      | Constrained at    | 0.25 Check   |
| PLAT300_ALERT_4_G | Atom Site Occupancy of H27B                      | Constrained at    | 0.25 Check   |
| PLAT300_ALERT_4_G | Atom Site Occupancy of H27C                      | Constrained at    | 0.25 Check   |
| PLAT300_ALERT_4_G | Atom Site Occupancy of H27D                      | Constrained at    | 0.25 Check   |
| PLAT301_ALERT_3_G | Main Residue Disorder .....                      | (Resd 1 )         | 28% Note     |
| PLAT302_ALERT_4_G | Anion/Solvent/Minor-Residue Disorder (Resd 2 )   |                   | 100% Note    |
| PLAT304_ALERT_4_G | Non-Integer Number of Atoms in .....             | Resd 2            | 6.50 Check   |
| PLAT721_ALERT_1_G | Bond Calc 0.97000, Rep 0.95990 Dev...            |                   | 0.01 Ang.    |
|                   | C24X -H24D                                       | 1.555 1.555 ..... | # 68 Check   |
| PLAT779_ALERT_4_G | Suspect or Irrelevant (Bond) Angle in CIF ....   | #                 | 120 Check    |
|                   | C25 -O3 -H27C                                    | 1.555 1.555 3.566 | 10.00 Deg.   |
| PLAT779_ALERT_4_G | Suspect or Irrelevant (Bond) Angle in CIF ....   | #                 | 125 Check    |
|                   | C27 -O3 -H27B                                    | 3.566 1.555 3.566 | 40.00 Deg.   |
| PLAT779_ALERT_4_G | Suspect or Irrelevant (Bond) Angle in CIF ....   | #                 | 126 Check    |

|                   |                                                  |       |       |            |
|-------------------|--------------------------------------------------|-------|-------|------------|
| C27 -O3 -H27D     | 3.566                                            | 1.555 | 3.566 | 38.00 Deg. |
| PLAT779_ALERT_4_G | Suspect or Irrelevant (Bond) Angle in CIF .... # |       |       | 149 Check  |
| O3 -C25 -H27C     | 1.555                                            | 1.555 | 3.566 | 4.00 Deg.  |
| PLAT779_ALERT_4_G | Suspect or Irrelevant (Bond) Angle in CIF .... # |       |       | 154 Check  |
| H25 -C25 -H26C    | 1.555                                            | 1.555 | 3.566 | 22.60 Deg. |
| PLAT779_ALERT_4_G | Suspect or Irrelevant (Bond) Angle in CIF .... # |       |       | 157 Check  |
| C26 -C25 -H26C    | 3.566                                            | 1.555 | 3.566 | 40.00 Deg. |
| PLAT779_ALERT_4_G | Suspect or Irrelevant (Bond) Angle in CIF .... # |       |       | 180 Check  |
| H26C -C26 -H25    | 1.555                                            | 1.555 | 3.566 | 14.50 Deg. |
| PLAT779_ALERT_4_G | Suspect or Irrelevant (Bond) Angle in CIF .... # |       |       | 186 Check  |
| C27 -C26 -H27A    | 3.566                                            | 1.555 | 3.566 | 33.80 Deg. |
| PLAT779_ALERT_4_G | Suspect or Irrelevant (Bond) Angle in CIF .... # |       |       | 188 Check  |
| O3 -C27 -H27C     | 3.566                                            | 1.555 | 1.555 | 19.00 Deg. |
| PLAT794_ALERT_5_G | Tentative Bond Valency for Pt1 (II) .            |       |       | 2.33 Info  |
| PLAT811_ALERT_5_G | No ADDSYM Analysis: Too Many Excluded Atoms .... |       |       | ! Info     |
| PLAT860_ALERT_3_G | Number of Least-Squares Restraints .....         |       |       | 9 Note     |
| PLAT909_ALERT_3_G | Percentage of I>2sig(I) Data at Theta(Max) Still |       |       | 55% Note   |
| PLAT910_ALERT_3_G | Missing # of FCF Reflection(s) Below Theta(Min). |       |       | 2 Note     |
| PLAT933_ALERT_2_G | Number of OMIT Records in Embedded .res File ... |       |       | 15 Note    |
| PLAT978_ALERT_2_G | Number C-C Bonds with Positive Residual Density. |       |       | 3 Info     |

---

2 **ALERT level A** = Most likely a serious problem - resolve or explain  
 2 **ALERT level B** = A potentially serious problem, consider carefully  
 10 **ALERT level C** = Check. Ensure it is not caused by an omission or oversight  
 42 **ALERT level G** = General information/check it is not something unexpected

4 ALERT type 1 CIF construction/syntax error, inconsistent or missing data  
 14 ALERT type 2 Indicator that the structure model may be wrong or deficient  
 8 ALERT type 3 Indicator that the structure quality may be low  
 28 ALERT type 4 Improvement, methodology, query or suggestion  
 2 ALERT type 5 Informative message, check

---

## checkCIF publication errors

### Alert level A

PUBL004\_ALERT\_1\_A The contact author's name and address are missing,  
                   \_publ\_contact\_author\_name and \_publ\_contact\_author\_address.  
 PUBL005\_ALERT\_1\_A \_publ\_contact\_author\_email, \_publ\_contact\_author\_fax and  
                   \_publ\_contact\_author\_phone are all missing.  
                   At least one of these should be present.  
 PUBL006\_ALERT\_1\_A \_publ\_requested\_journal is missing  
                   e.g. 'Acta Crystallographica Section C'  
 PUBL008\_ALERT\_1\_A \_publ\_section\_title is missing. Title of paper.  
 PUBL009\_ALERT\_1\_A \_publ\_author\_name is missing. List of author(s) name(s).  
 PUBL010\_ALERT\_1\_A \_publ\_author\_address is missing. Author(s) address(es).  
 PUBL012\_ALERT\_1\_A \_publ\_section\_abstract is missing.  
                   Abstract of paper in English.

---

7 **ALERT level A** = Data missing that is essential or data in wrong format  
 0 **ALERT level G** = General alerts. Data that may be required is missing

---

## Publication of your CIF

You should attempt to resolve as many as possible of the alerts in all categories. Often the minor alerts point to easily fixed oversights, errors and omissions in your CIF or refinement strategy, so attention to these fine details can be worthwhile. In order to resolve some of the more serious problems it may be necessary to carry out additional measurements or structure refinements. However, the nature of your study may justify the reported deviations from journal submission requirements and the more serious of these should be commented upon in the discussion or experimental section of a paper or in the "special\_details" fields of the CIF. *checkCIF* was carefully designed to identify outliers and unusual parameters, but every test has its limitations and alerts that are not important in a particular case may appear. Conversely, the absence of alerts does not guarantee there are no aspects of the results needing attention. It is up to the individual to critically assess their own results and, if necessary, seek expert advice.

If level A alerts remain, which you believe to be justified deviations, and you intend to submit this CIF for publication in a journal, you should additionally insert an explanation in your CIF using the Validation Reply Form (VRF) below. This will allow your explanation to be considered as part of the review process.

## Validation response form

Please find below a validation response form (VRF) that can be filled in and pasted into your CIF.

```
# start Validation Reply Form
_vrf_PUBL004_GLOBAL
;
PROBLEM: The contact author's name and address are missing,
RESPONSE: ...
;
_vrf_PUBL005_GLOBAL
;
PROBLEM: _publ_contact_author_email, _publ_contact_author_fax and
RESPONSE: ...
;
_vrf_PUBL006_GLOBAL
;
PROBLEM: _publ_requested_journal is missing
RESPONSE: ...
;
_vrf_PUBL008_GLOBAL
;
PROBLEM: _publ_section_title is missing. Title of paper.
RESPONSE: ...
;
_vrf_PUBL009_GLOBAL
;
PROBLEM: _publ_author_name is missing. List of author(s) name(s).
RESPONSE: ...
;
_vrf_PUBL010_GLOBAL
;
PROBLEM: _publ_author_address is missing. Author(s) address(es).
RESPONSE: ...
;
_vrf_PUBL012_GLOBAL
;
PROBLEM: _publ_section_abstract is missing.
```

```

RESPONSE: ...
;
_vrf_PLAT770_shi_3848_mz
;
PROBLEM: Suspect C-H Bond in CIF: C26      --H27A      .      1.44 Ang.
RESPONSE: ...
;
_vrf_PLAT772_shi_3848_mz
;
PROBLEM: Suspect O-H Bond in CIF: O3        --H27D      ..     1.52 Ang.
RESPONSE: ...
;
# end Validation Reply Form

```

If you wish to submit your CIF for publication in Acta Crystallographica Section C or E, you should upload your CIF via the web. If you wish to submit your CIF for publication in IUCrData you should upload your CIF via the web. If your CIF is to form part of a submission to another IUCr journal, you will be asked, either during electronic submission or by the Co-editor handling your paper, to upload your CIF via our web site.

---

## PLATON version of 19/10/2018; check.def file version of 15/10/2018

Datablock shi\_3848\_mz - ellipsoid plot

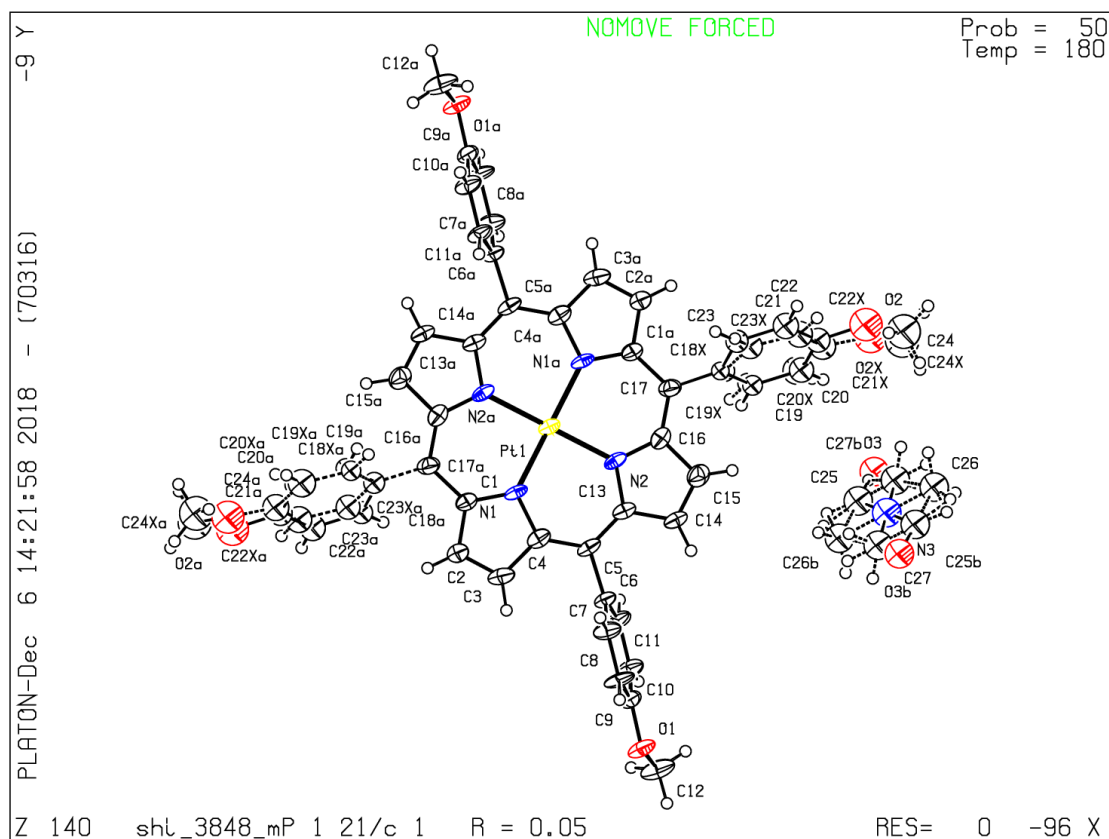

Supplement: s1 [file s1]
