# Supplementary material for: X-ray Structure Elucidation of a Pt-Metalloporphyrin and Its Application for Obtaining Sensitive AuNPs-Plasmonic Hybrids Capable of Detecting Triiodide Anions
Source: MDPI journal article supplement (doi:10.3390/ijms20030710), 2019-02-07
Supplement: s1 [file s1]

## Supporting Information For:

### X-ray structure elucidation of Pt-metalloporphyrin and its application for obtaining sensitive nano-Au-plasmonic hybrids capable to detect iodide anions

Eugenia Fagadar-Cosma<sup>1\*</sup>, Anca Lascu<sup>1</sup>, Sergiu Shova<sup>2</sup>, Mirela-Fernanda Zaltariov<sup>2</sup>, Mihaela Birdeanu<sup>3</sup>, Lilia Croitor<sup>1</sup>, Adriana Balan<sup>4</sup>, Diana Anghel<sup>1</sup> and Serban Stamatina<sup>4</sup>

<sup>1</sup> Institute of Chemistry Timisoara of Romanian Academy, Mihai Viteazu Ave. No. 24, Timisoara, 300223, Romania; efagadar@yahoo.com, ancalascu@yahoo.com, croitor.lilia@gmail.com, dianaracanel@yahoo.com

<sup>2</sup> "Petru Poni" Institute of Macromolecular Chemistry, Laboratory of Inorganic Polymers, Aleea Grigore Ghica Voda No. 41A, RO-700487 Iasi, Romania; shova@icmpp.ro, zaltariov.mirela@icmpp.ro

<sup>3</sup> National Institute for Research and Development in Electrochemistry and Condensed Matter, P. Andronescu Street, No. 1, 300224- Timisoara, Romania, mihaione2002@yahoo.com.

<sup>4</sup> University of Bucharest, Faculty of Physics - 3Nano-SAE research Center, Atomistilor Street, No 405, Măgurele, 077125, Romania, andronie@3nanosae.org, serban@3nanosae.org

\* Correspondence: efagadar@yahoo.com; Tel.: +40-256-491818;

**Table S1.** Bond distances (Å) and angles (°).

|                     |           |         |           |
|---------------------|-----------|---------|-----------|
| Pt1-N1              | 2.000(7)  | C8-C9   | 1.389(11) |
| Pt1-N2              | 2.017(7)  | C9-C10  | 1.388(10) |
| O1-C9               | 1.366(8)  | C10-C11 | 1.377(11) |
| O1-C12              | 1.425(9)  | C13-C14 | 1.410(12) |
| O2-C21              | 1.376(10) | C14-C15 | 1.349(12) |
| O2-C24              | 1.421(12) | C15-C16 | 1.440(11) |
| N1-C1               | 1.375(11) | C16-C17 | 1.392(11) |
| N1-C4               | 1.401(10) | C17-C18 | 1.448(12) |
| N2-C13              | 1.387(10) | C22-C21 | 1.39      |
| N2-C16              | 1.376(11) | C22-C23 | 1.39      |
| C1-C2               | 1.417(11) | C21-C20 | 1.39      |
| C1-C17 <sup>1</sup> | 1.419(11) | C20-C19 | 1.39      |
| C2-C3               | 1.354(12) | C19-C18 | 1.39      |
| C3-C4               | 1.453(13) | C18-C23 | 1.39      |
| C4-C5               | 1.388(12) | O3-C25  | 1.22(5)   |
| C5-C6               | 1.484(10) | N3-C252 | 1.391(10) |
| C5-C13              | 1.381(12) | N3-C25  | 1.391(10) |
| C6-C7               | 1.384(10) | N3-C26  | 1.467(10) |

|        |           |        |           |
|--------|-----------|--------|-----------|
| C6-C11 | 1.374(10) | N3-C27 | 1.462(10) |
| C7-C8  | 1.382(11) |        |           |

|                        |           |             |          |
|------------------------|-----------|-------------|----------|
| N1-Pt1-N2              | 90.0(3)   | C10-C9-C8   | 118.8(7) |
| C9-O1-C12              | 116.7(6)  | C11-C10-C9  | 119.9(8) |
| C21-O2-C24             | 115.2(17) | C6-C11-C10  | 122.4(8) |
| C1-N1-Pt1              | 128.0(5)  | N2-C13-C14  | 110.1(8) |
| C1-N1-C4               | 105.6(7)  | C5-C13-N2   | 125.6(8) |
| C4-N1-Pt1              | 126.4(6)  | C5-C13-C14  | 124.2(7) |
| C13-N2-Pt1             | 127.3(6)  | C15-C14-C13 | 107.3(8) |
| C16-N2-Pt1             | 126.7(5)  | C14-C15-C16 | 107.7(9) |
| C16-N2-C13             | 106.0(7)  | N2-C16-C15  | 108.7(8) |
| N1-C1-C2               | 110.7(7)  | N2-C16-C17  | 126.8(8) |
| N1-C1-C17 <sup>1</sup> | 125.2(8)  | C17-C16-C15 | 124.4(9) |
| C2-C1-C17 <sup>1</sup> | 124.0(9)  | C11-C17-C18 | 117.7(8) |
| C3-C2-C1               | 107.9(9)  | C16-C17-C11 | 123.2(9) |
| C2-C3-C4               | 106.8(7)  | C16-C17-C18 | 118.9(8) |
| N1-C4-C3               | 108.8(8)  | C21-C22-C23 | 120      |
| C5-C4-N1               | 126.3(8)  | O2-C21-C22  | 115.5(9) |
| C5-C4-C3               | 124.8(8)  | O2-C21-C20  | 124.4(9) |
| C4-C5-C6               | 117.4(8)  | C22-C21-C20 | 120      |
| C13-C5-C4              | 124.2(7)  | C21-C20-C19 | 120      |
| C13-C5-C6              | 118.4(7)  | C18-C19-C20 | 120      |
| C7-C6-C5               | 122.6(7)  | C19-C18-C17 | 118.0(7) |
| C11-C6-C5              | 120.5(7)  | C19-C18-C23 | 120      |
| C11-C6-C7              | 116.9(7)  | C23-C18-C17 | 122.0(7) |
| C8-C7-C6               | 122.3(8)  | C18-C23-C22 | 120      |
| C7-C8-C9               | 119.6(7)  | C25-N3-C26  | 117(2)   |
| O1-C9-C8               | 115.6(7)  | C27-N3-C26  | 109(2)   |
| O1-C9-C10              | 125.5(8)  | O3-C25-N3   | 120(4)   |

Symmetry code: <sup>1</sup>) 1-x, 1-y, 2-z
